# Supplementary material for: Combination of pulsed laser ablation and inert gas condensation for the synthesis of nanostructured nanocrystalline, amorphous and composite materials
Source: Royal Society of Chemistry journal article supplement (doi:10.1039/c9na00533a), 2019-01-01
Supplement: c9na00533a1.pdf [file c9na00533a1.pdf]

## Electronic Supplementary Information (ESI)

# Combination of Pulsed Laser Ablation and Inert Gas Condensation for the Synthesis of Nanostructured Nanocrystalline, Amorphous and Composite Materials

Soumabha Bag,<sup>‡\*a</sup> Ananya Baksi,<sup>‡a</sup> Di Wang,<sup>ab</sup> Robert Kruk,<sup>a</sup> Cahit Benel,<sup>a</sup> Mohammed Reda Chellali<sup>a</sup> and Horst Hahn<sup>\*ac</sup>

Address: <sup>a</sup>Institute of Nanotechnology, Karlsruhe Institute of Technology, 76344 Eggenstein-Leopoldshafen, Germany

<sup>b</sup>Karlsruhe Nano Micro Facility, Karlsruhe Institute of Technology, 76344 Eggenstein-Leopoldshafen, Germany

<sup>c</sup>Herbert Gleiter Institute of Nanoscience, Nanjing University of Science and Technology, Nanjing, China

<sup>‡</sup>These authors contributed equally

Email: Soumabha Bag - [soumabha.bag@kit.edu](mailto:soumabha.bag@kit.edu) and

Horst Hahn - [horst.hahn@kit.edu](mailto:horst.hahn@kit.edu)

\*Corresponding author

Supporting Information 1:

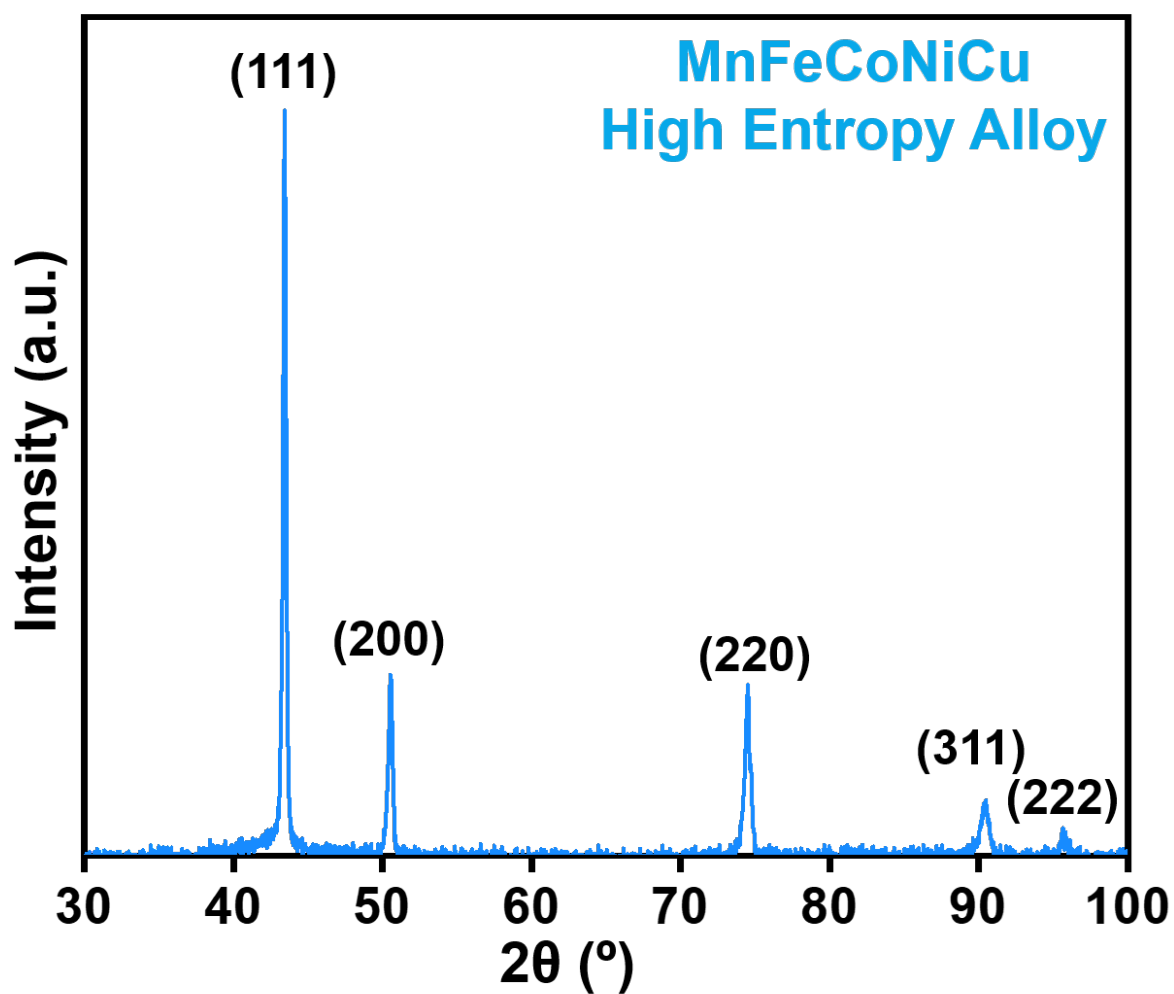

**Figure S1:** X-ray diffractogram of HEA (MnFeCoNiCu) sample. Strong peaks at (111), (200), (220), (311) and (222) indicates the presence of fcc phase in the ablated nanopowders.

## Supporting Information 2:

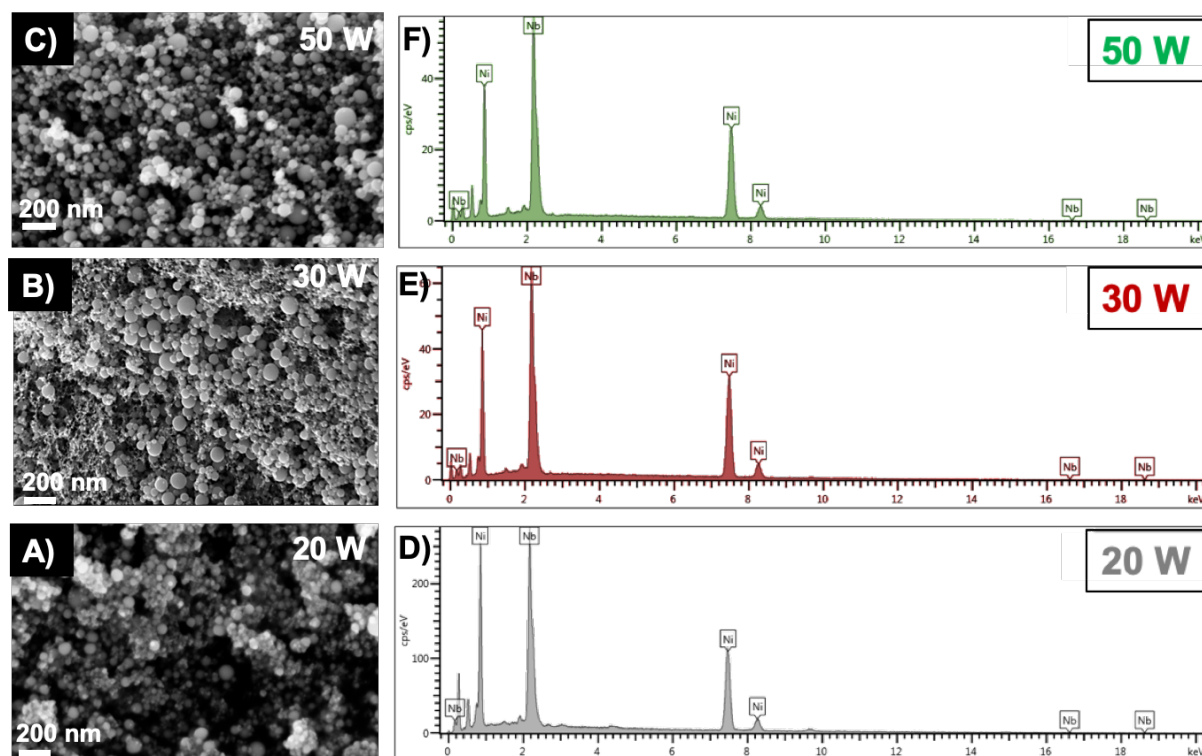

**Figure S2:** SEM images of the as-synthesized particles at A) 20 W, B) 30 W and C) 50 W laser powers. Corresponding EDX spectra are shown in D) to F).

Supporting Information 3:

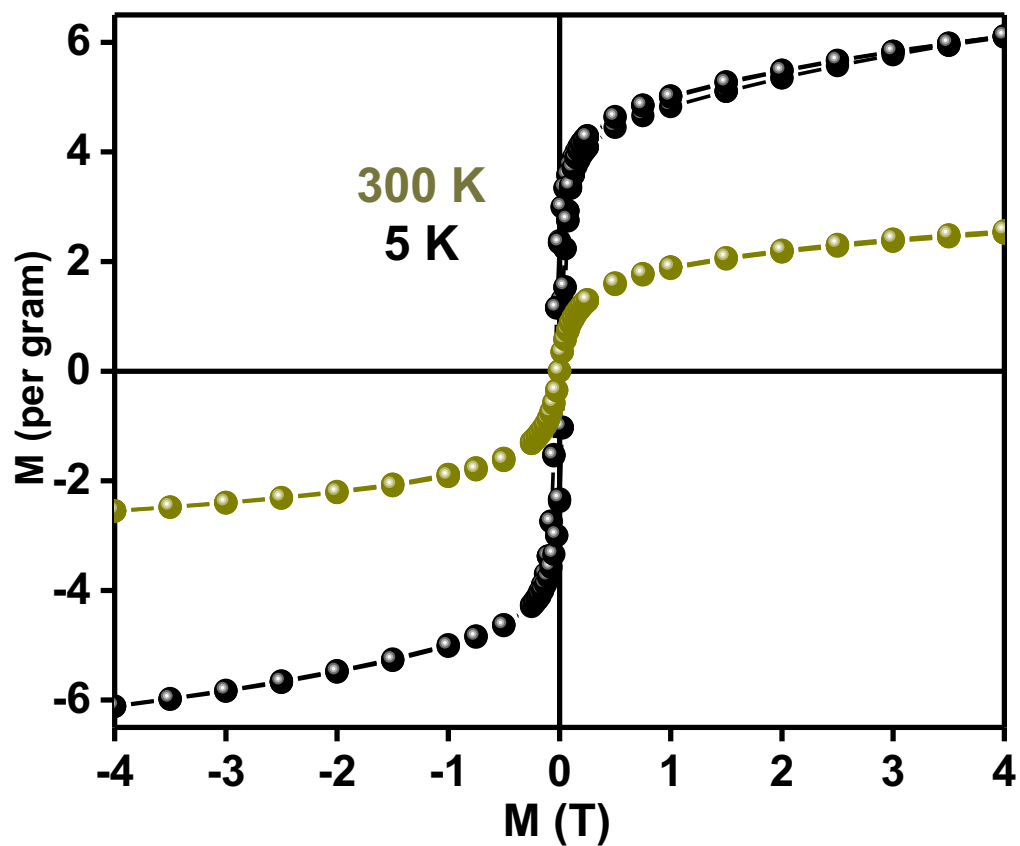

**Figure S3:** Temperature dependence of the magnetisation hysteresis loops of  $\text{Ni}_{60}\text{Nb}_{40}$  nanopowder synthesized at 20 W laser power.

Supporting Information 4:

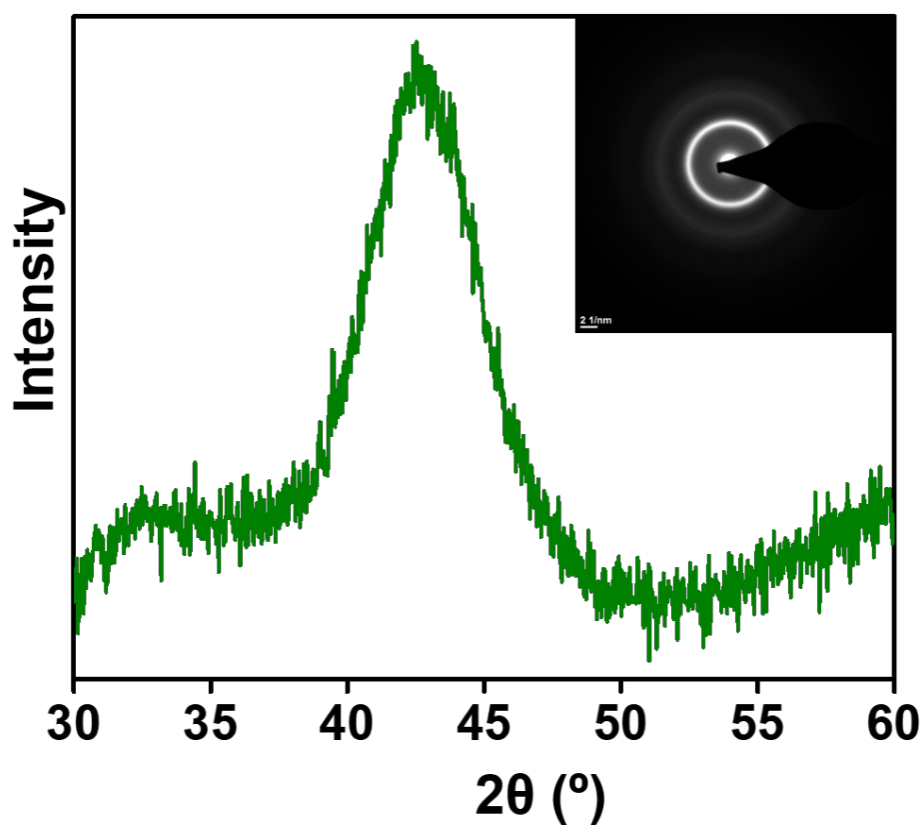

**Figure S4:** Structural characterization of Ni<sub>60</sub>Nb<sub>40</sub> melt-spun-ribbon (MSR). Featureless halo XRD pattern and diffuse rings in SAED (in the inset) indicate presence of amorphous phase in the sample.
